# Supplementary material
Source: Royal Society of Chemistry journal article supplement (doi:10.1039/d6ta02888h)
Supplement: d6ta02888h1.pdf [file d6ta02888h1.pdf]

## Supplementary Information (SI)

### Interfacial Electron Transfer-Driven Activity Enhancements of Carbide/Alloy Heterostructured Catalysts toward Water Electrolysis for High-Performance Anion Exchange Membrane Water Electrolysis

Kai-An Lee,<sup>a</sup> Yu-Chieh Ting,<sup>a</sup> Chiung-Wen Chang,<sup>a</sup> Tzu-Hsiang Lin,<sup>a</sup> Shao-I Chang,<sup>a</sup> Tsung-Wei Hsueh,<sup>a</sup> Chia-Hsien Lin,<sup>a</sup> Shih-Yuan Lu<sup>a\*</sup>

<sup>a</sup> Department of Chemical Engineering, National Tsing Hua University, Hsinchu 300044, Taiwan  
\*Email: [sylu@mx.nthu.edu.tw](mailto:sylu@mx.nthu.edu.tw)

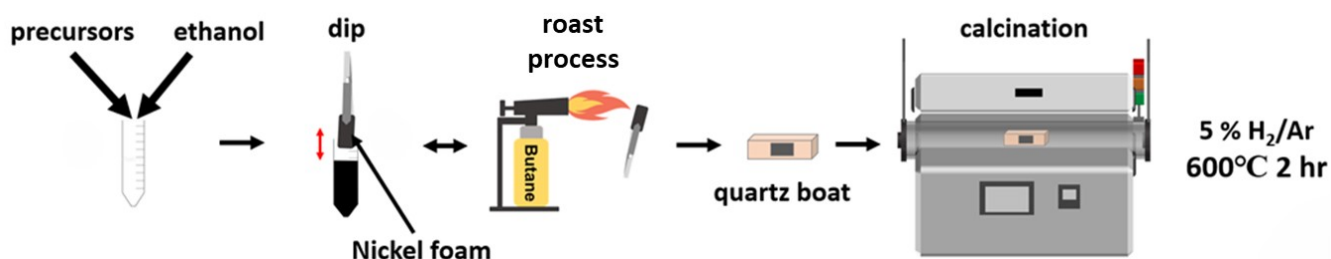

**Scheme S1.** Illustration of fabrication process for carbide/alloy heterostructured catalysts.

**Table S1.** Metallic compositions of sample catalysts determined with ICP-OES.

|                          | Fe (at%) | Ni (at%) | Mo (at%) |
|--------------------------|----------|----------|----------|
| Mo <sub>2</sub> C/NiMo   | -        | 54.3     | 45.7     |
| Mo <sub>2</sub> C/FeNiMo | 15.9     | 48.1     | 35.9     |
| Mo <sub>2</sub> C        | -        | -        | 100.0*   |
| NiMo                     | -        | 89.8     | 10.2     |
| FeNiMo                   | 21.0     | 68.8     | 10.2     |

\*: exclude Ni contamination.

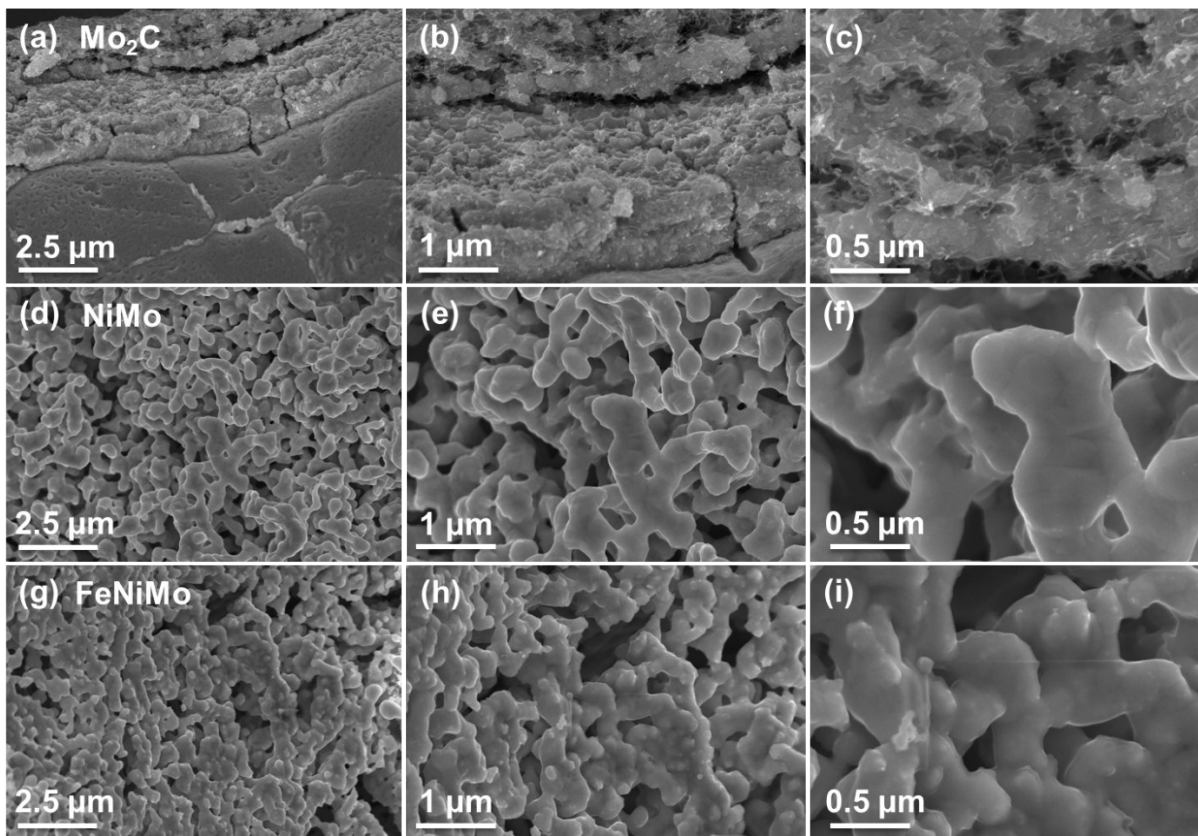

**Figure S1.** SEM images of (a-c) Mo<sub>2</sub>C, (d-f) NiMo, and (g-i) FeNiMo at increasing magnifications.

**Table S2.** Binding energies of constituent peaks of Ni 2p in HRXPS spectra of Mo<sub>2</sub>C/NiMo and NiMo.

|                        |                      | Ni <sup>0</sup> (eV) | Ni <sup>2+</sup> (eV) | sat. (eV) |
|------------------------|----------------------|----------------------|-----------------------|-----------|
| Mo <sub>2</sub> C/NiMo | Ni 2p <sub>3/2</sub> | 870.3                | 873.4                 | 877.4     |
|                        | Ni 2p <sub>1/2</sub> | 853.0                | 856.1                 | 860.1     |
| NiMo                   | Ni 2p <sub>3/2</sub> | 870.2                | 873.3                 | 877.3     |
|                        | Ni 2p <sub>1/2</sub> | 852.9                | 856.0                 | 860.0     |

**Table S3.** Binding energies of constituent peaks of C 1s in HRXPS spectra of Mo<sub>2</sub>C/NiMo and Mo<sub>2</sub>C.

|                        | C=O (eV) | C-O (eV) | C-C/C-H (eV) | Mo-C (eV) |
|------------------------|----------|----------|--------------|-----------|
| Mo <sub>2</sub> C/NiMo | 288.4    | 285.7    | 284.8        | 284.2     |
| Mo <sub>2</sub> C      | 288.4    | 285.7    | 284.8        | 284.2     |

**Table S4.** Binding energies of constituent peaks of Mo 3d in HRXPS spectra of Mo<sub>2</sub>C/NiMo, Mo<sub>2</sub>C, and NiMo.

|                        |                      | Mo <sup>0</sup> (eV) | Mo <sup>2+</sup> (eV) | Mo <sup>4+</sup> (eV) | Mo <sup>6+</sup> (eV) |
|------------------------|----------------------|----------------------|-----------------------|-----------------------|-----------------------|
| Mo <sub>2</sub> C/NiMo | Mo 3d <sub>3/2</sub> | 231.2                | 231.4                 | 232.5                 | 235.3                 |
|                        | Mo 3d <sub>5/2</sub> | 228.0                | 228.3                 | 229.3                 | 232.1                 |
| Mo <sub>2</sub> C      | Mo 3d <sub>3/2</sub> | -                    | 231.5                 | 232.6                 | 235.5                 |
|                        | Mo 3d <sub>5/2</sub> | -                    | 228.4                 | 229.4                 | 232.2                 |
| NiMo                   | Mo 3d <sub>3/2</sub> | 231.3                | -                     | 232.6                 | 235.4                 |
|                        | Mo 3d <sub>5/2</sub> | 228.1                | -                     | 229.4                 | 232.2                 |

**Table S5.** Binding energies of constituent peaks of Fe 2p in HRXPS spectra of Mo<sub>2</sub>C/FeNiMo and FeNiMo.

|                          |                      | Fe <sup>0</sup> (eV) | Fe <sup>2+</sup> (eV) | Fe <sup>3+</sup> (eV) | sat. (eV) |
|--------------------------|----------------------|----------------------|-----------------------|-----------------------|-----------|
| Mo <sub>2</sub> C/FeNiMo | Fe 2p <sub>3/2</sub> | 720.5                | 723.4                 | 725.6                 | 728.5     |
|                          | Fe 2p <sub>1/2</sub> | 707.4                | 710.3                 | 712.5                 | 715.4     |
| FeNiMo                   | Fe 2p <sub>3/2</sub> | 720.4                | 723.3                 | 725.5                 | 728.4     |
|                          | Fe 2p <sub>1/2</sub> | 707.3                | 710.2                 | 712.4                 | 715.3     |

**Table S6.** Binding energies of constituent peaks of Ni 2p in HRXPS spectra of Mo<sub>2</sub>C/FeNiMo and FeNiMo.

|                          |                      | Ni <sup>0</sup> (eV) | Ni <sup>2+</sup> (eV) | sat. (eV) |
|--------------------------|----------------------|----------------------|-----------------------|-----------|
| Mo <sub>2</sub> C/FeNiMo | Ni 2p <sub>3/2</sub> | 870.3                | 873.4                 | 877.4     |
|                          | Ni 2p <sub>1/2</sub> | 853.0                | 856.1                 | 860.1     |
| FeNiMo                   | Ni 2p <sub>3/2</sub> | 870.2                | 873.3                 | 877.3     |
|                          | Ni 2p <sub>1/2</sub> | 852.9                | 856.0                 | 860.0     |

**Table S7.** Binding energies of constituent peaks of C 1s in HRXPS spectra of Mo<sub>2</sub>C/FeNiMo and Mo<sub>2</sub>C.

|                          | C=O (eV) | C-O (eV) | C-C (eV) | Mo-C (eV) |
|--------------------------|----------|----------|----------|-----------|
| Mo <sub>2</sub> C/FeNiMo | 288.4    | 286.0    | 284.6    | 284.2     |
| Mo <sub>2</sub> C        | 288.4    | 285.7    | 284.8    | 284.2     |

**Table S8.** Binding energies of constituent peaks of Mo 3d in HRXPS spectra of Mo<sub>2</sub>C/NiMo, Mo<sub>2</sub>C and NiMo.

|                          |                      | Mo <sup>0</sup> (eV) | Mo <sup>2+</sup> (eV) | Mo <sup>4+</sup> (eV) | Mo <sup>6+</sup> (eV) |
|--------------------------|----------------------|----------------------|-----------------------|-----------------------|-----------------------|
| Mo <sub>2</sub> C/FeNiMo | Mo 3d <sub>3/2</sub> | 231.2                | 231.4                 | 232.5                 | 235.3                 |
|                          | Mo 3d <sub>5/2</sub> | 228.0                | 228.3                 | 229.3                 | 232.1                 |
| Mo <sub>2</sub> C        | Mo 3d <sub>3/2</sub> | -                    | 231.5                 | 232.6                 | 235.5                 |
|                          | Mo 3d <sub>5/2</sub> | -                    | 228.4                 | 229.4                 | 232.2                 |
| FeNiMo                   | Mo 3d <sub>3/2</sub> | 231.3                | -                     | 232.6                 | 235.4                 |
|                          | Mo 3d <sub>5/2</sub> | 228.1                | -                     | 229.4                 | 232.2                 |

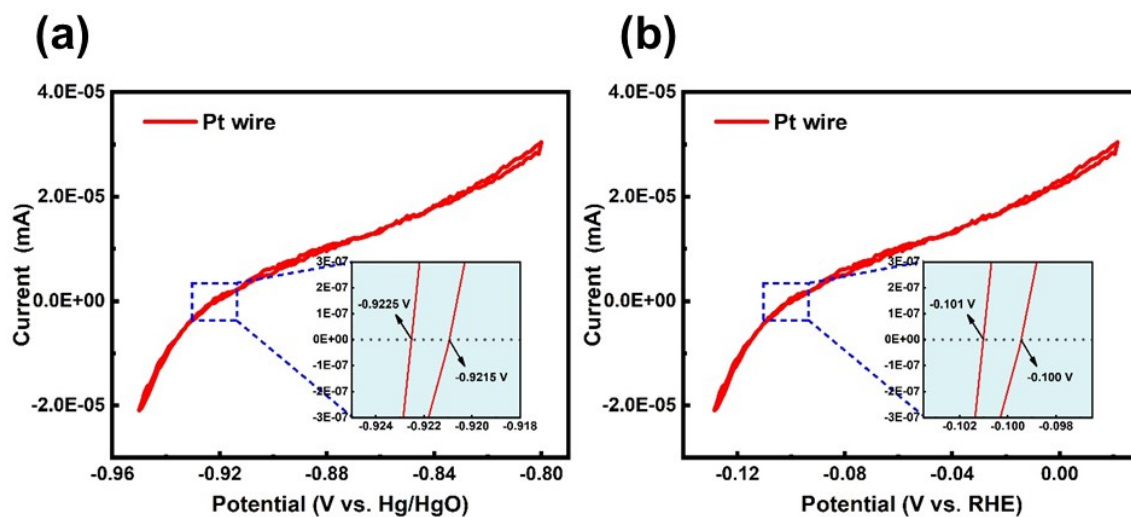

**Figure S2.** The reference electrode is calibrated in a three-electrode system, with Pt wires serving as both working and counter electrodes and Hg/HgO as the reference electrode in 1.0 M KOH. The pH value of the electrolyte is determined to be 13.9 with a pH meter. Prior to the calibration, the electrolyte is saturated with H<sub>2</sub> for at least 30 mins. The scan rate is set at 1.0 mV s<sup>-1</sup>. The potential of Hg/HgO is calibrated by aligning the average of the zero current potential (-0.922 vs. Hg/HgO) of the CV curve (inset of **Figure S2a**) to 0 V vs. RHE (inset of **Figure S2b**) according to Nernst's equation ( $E_{\text{RHE}} = E_{\text{Hg/HgO}} + 0.0591 \times \text{pH} + E^0_{\text{Hg/HgO}}$ ). Consequently, the potential of the reference electrode used in this work is calibrated to 0.1005 V (vs. NHE).

**Table S9.** Charge transfer resistances ( $R_{ct}$ ) of HER catalyzed by sample catalysts determined at -0.2 V (vs. RHE).

| Catalyst               | $R_{ct}$ ( $\Omega$ ) |
|------------------------|-----------------------|
| Mo <sub>2</sub> C/NiMo | 0.94                  |
| Mo <sub>2</sub> C      | 1.00                  |
| NiMo                   | 4.35                  |

**Table S10.** Charge transfer resistances ( $R_{ct}$ ) of OER catalyzed by sample catalysts determined at 1.53 V (vs. RHE).

| Catalyst                 | $R_{ct}$ ( $\Omega$ ) |
|--------------------------|-----------------------|
| Mo <sub>2</sub> C/FeNiMo | 1.05                  |
| Mo <sub>2</sub> C        | 1.70                  |
| FeNiMo                   | 2.03                  |

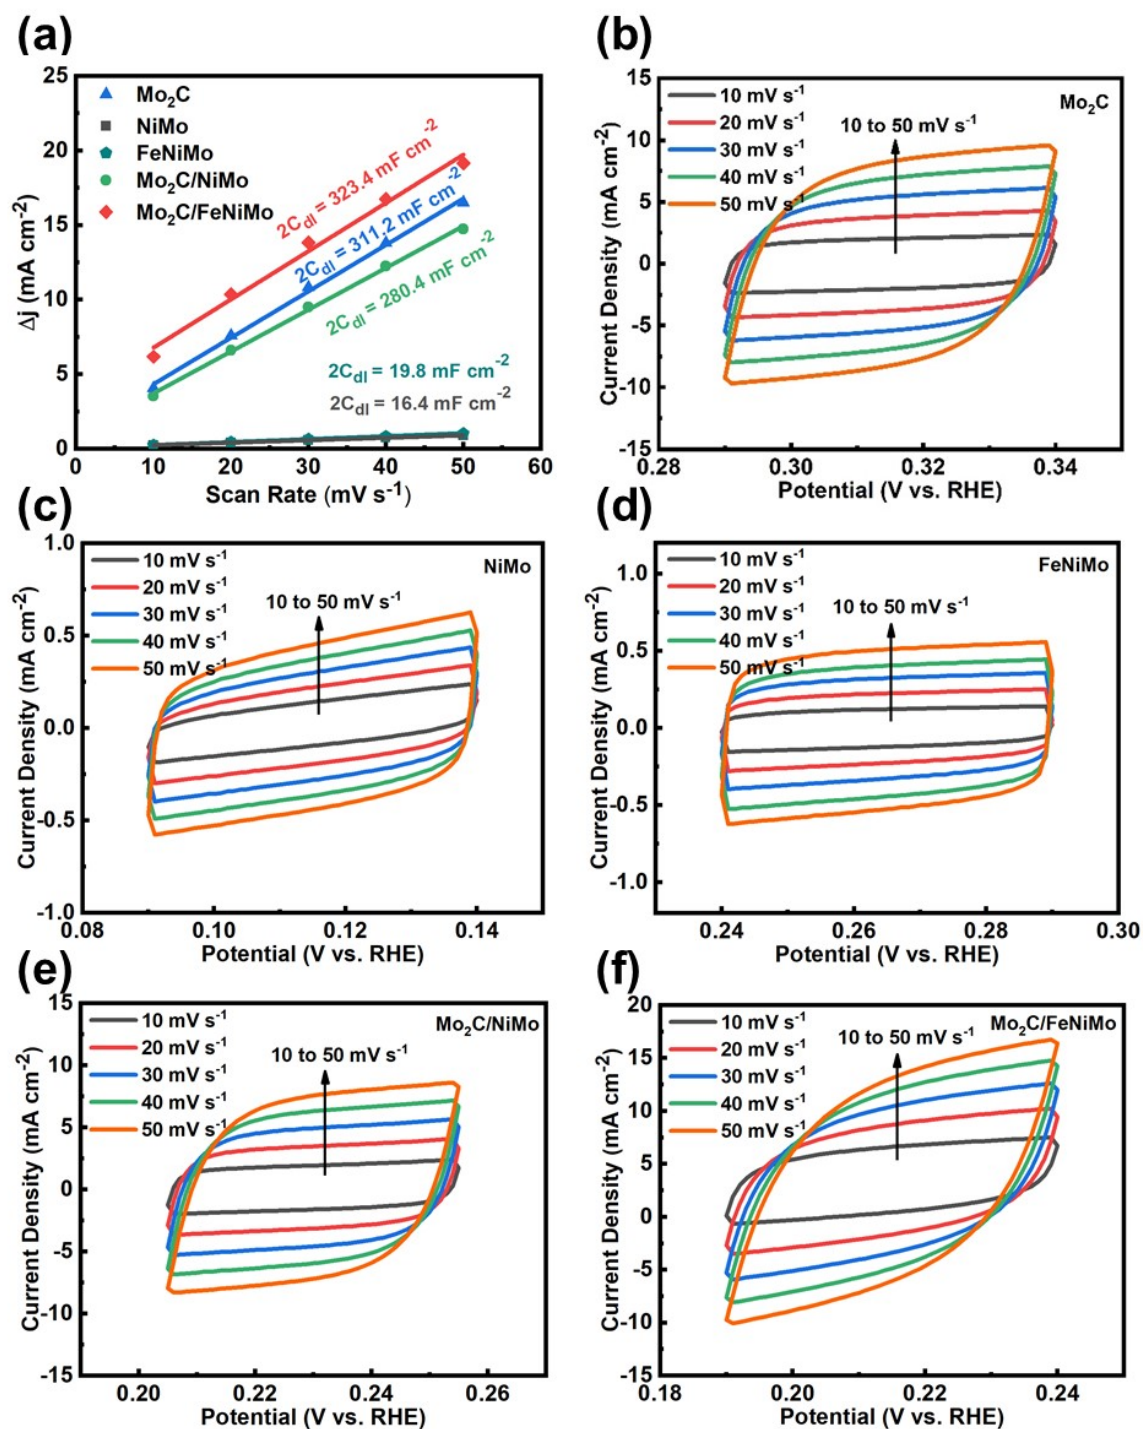

**Figure S3.** (a) Linear fitting of current density differences ( $\Delta j = j_a - j_c$ ) at a specific potential versus scan rates for determination of electric double layer capacitances ( $C_{dl}$ ) of sample catalysts as halves of obtained slopes. Cyclic voltammetry curves recorded at increasing scan rates in 1 M KOH for: (b)  $\text{Mo}_2\text{C}$ , (c)  $\text{NiMo}$ , (d)  $\text{FeNiMo}$ , (e)  $\text{Mo}_2\text{C}/\text{NiMo}$ , and (f)  $\text{Mo}_2\text{C}/\text{FeNiMo}$ .

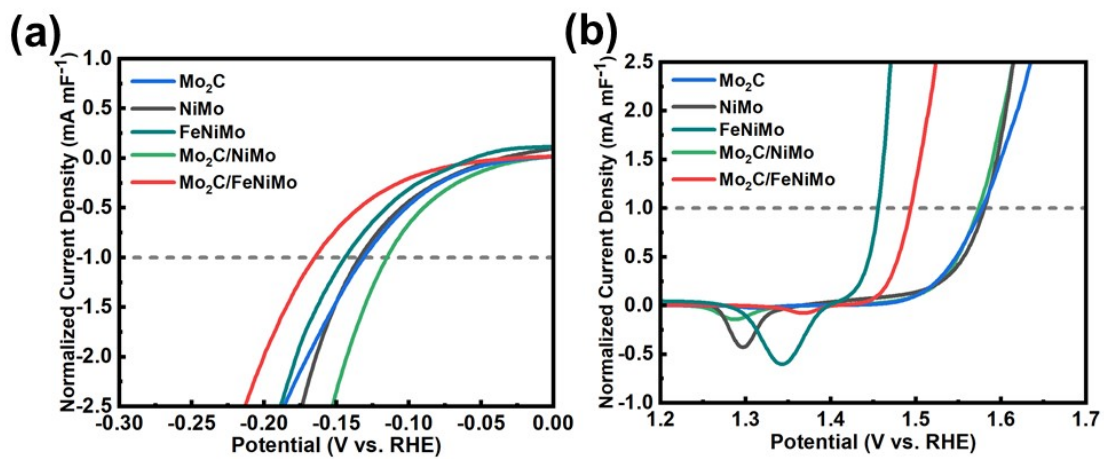

**Figure S4.**  $C_{dl}$ -normalized polarization curves for (a) HER and (b) OER catalyzed by sample catalysts.

**Table S11.** Electrochemical performances of Mo<sub>2</sub>C/NiMo//PiperION//Mo<sub>2</sub>C/FeNiMo based AEMWE compared with those of state-of-the-art non-precious transition metal catalysts based AEMWE's reported in recent years.

| Cathode                                    | Membrane        | Anode                                                 | Electrolyte    | Cell temperature (°C) | Current density                      | Ref.             |
|--------------------------------------------|-----------------|-------------------------------------------------------|----------------|-----------------------|--------------------------------------|------------------|
| <b>Mo<sub>2</sub>C/NiMo@NF</b>             | <b>PiperION</b> | <b>Mo<sub>2</sub>C/FeNiMo@NF</b>                      | <b>1 M KOH</b> | <b>60</b>             | <b>2645 mA cm<sup>-2</sup> @2.0V</b> | <b>This work</b> |
| Mo <sub>5</sub> N <sub>6</sub> /Ni-450     | FAA-3-PK-130    | Mo <sub>5</sub> N <sub>6</sub> /Co-450                | 1 M KOH        | 70                    | 450 mA cm <sup>-2</sup> @1.8V        | [1]              |
| PMoNiTm                                    | UTP220          | NiFe LDH                                              | 1 M KOH        | 70                    | 520 mA cm <sup>-2</sup> @2.0V        | [2]              |
| BP/CoNiSe <sub>2</sub>                     | FAA-3-50        | NiFe LDH                                              | 1 M KOH        | 60                    | 600 mA cm <sup>-2</sup> @1.9V        | [3]              |
| NiFeS@Ti <sub>3</sub> C <sub>2</sub>       | X37-50 RT       | NiFeS@Ti <sub>3</sub> C <sub>2</sub>                  | 1 M KOH        | 50                    | 800 mA cm <sup>-2</sup> @2.0V        | [4]              |
| Ce <sub>0.1</sub> -Fe <sub>2</sub> P/NiCoP | X37-50          | Ce <sub>0.1</sub> -Fe <sub>2</sub> P/NiCoP            | 1 M KOH        | 60                    | 900 mA cm <sup>-2</sup> @1.8V        | [5]              |
| NiMoO <sub>x</sub> @CMK-3                  | FAA-3-50        | NiFe LDH                                              | 1 M KOH        | 50                    | 1140 mA cm <sup>-2</sup> @2.0V       | [6]              |
| Co <sub>2</sub> P-NiP <sub>5</sub> /NF     | FAA-3-50        | Fe <sub>2</sub> P-Ni <sub>12</sub> P <sub>5</sub> /NF | 1 M KOH        | 60                    | 1200 mA cm <sup>-2</sup> @2.0V       | [7]              |
| Ni-CeO <sub>2</sub> /Carbon                | HQPC-TMA        | Co <sub>3</sub> O <sub>4</sub>                        | alkaline       | 60                    | 1500 mA cm <sup>-2</sup> @2.0V       | [8]              |
| Mn-NiFe@WO <sub>x</sub>                    | PiperION        | Mn-NiFe@WO <sub>x</sub>                               | 1 M KOH        | 60                    | 1600 mA cm <sup>-2</sup> @2.0V       | [9]              |

**Table S12.** High frequency resistance (HFR) and charge transfer resistances ( $R_1$  for HER and  $R_2$  for OER) of sample AEMWE's determined at 1.8 V.

| AEMWE                                                           | EIS measurements |             |             |
|-----------------------------------------------------------------|------------------|-------------|-------------|
|                                                                 | HFR              | $R_1$ (HER) | $R_2$ (OER) |
| Mo <sub>2</sub> C/NiMo@N//PiperION//Mo <sub>2</sub> C/FeNiMo@NF | 0.019            | 0.0110      | 0.0145      |
| Mo <sub>2</sub> C@NF//PiperION//Mo <sub>2</sub> C/FeNiMo@NF     | 0.022            | 0.0113      | 0.0145      |
| Mo <sub>2</sub> C/NiMo@NF//PiperION//FeNiMo@NF                  | 0.021            | 0.0110      | 0.0209      |
| Mo <sub>2</sub> C/NiMo@NF//PiperION//Mo <sub>2</sub> C@NF       | 0.022            | 0.0110      | 0.0518      |
| NiMo@NF//PiperION//Mo <sub>2</sub> C/FeNiMo@NF                  | 0.023            | 0.0655      | 0.0145      |

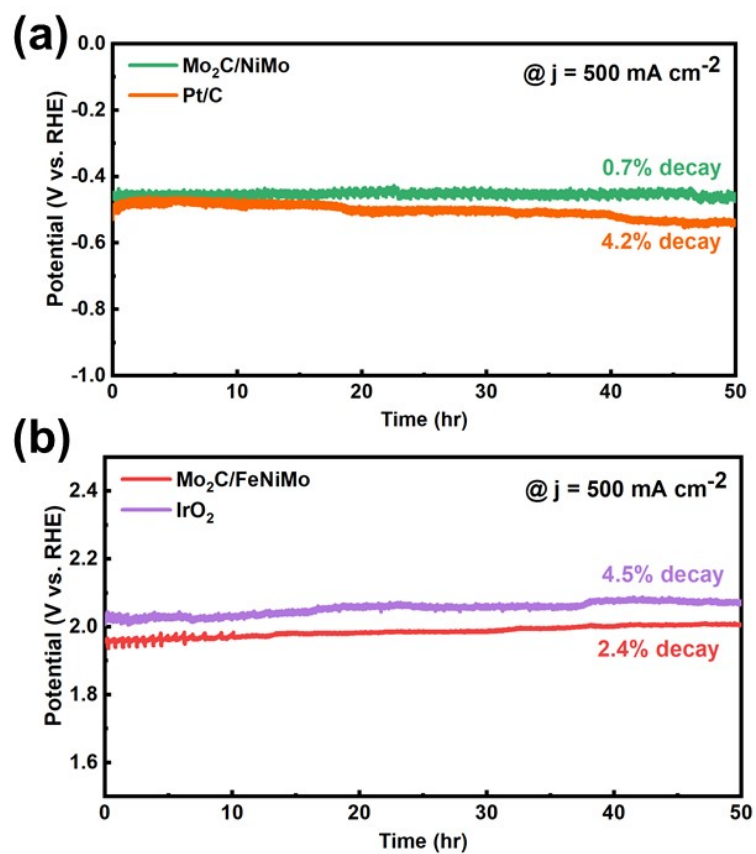

**Figure S5.** Chronopotentiometric stability tests for (a)  $\text{Mo}_2\text{C}/\text{NiMo}$  and (b)  $\text{Mo}_2\text{C}/\text{FeNiMo}$  under  $0.5 \text{ A cm}^{-2}$  for 50 hours toward HER and OER operations, respectively.

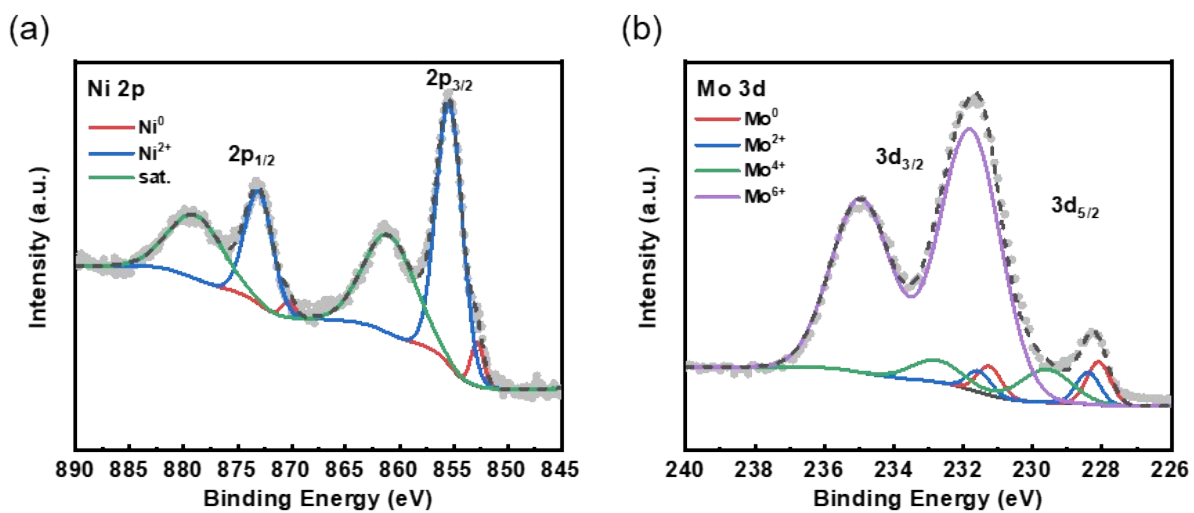

**Figure S6.** HRXPS spectra of (a) Ni 2p and (c) Mo 3d for  $Mo_2C/NiMo$  after HER stability test.

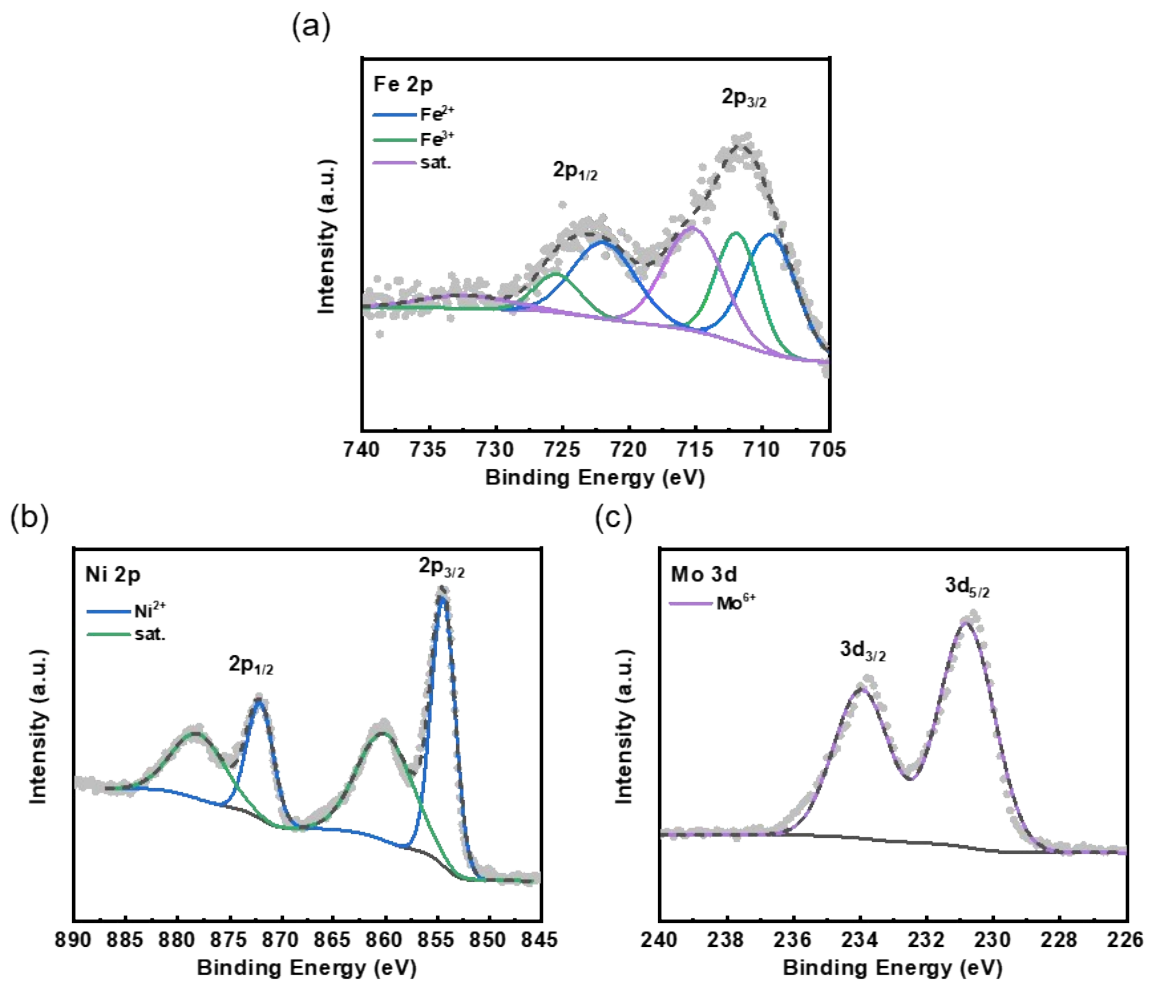

**Figure S7.** HRXPS spectra of (a) Fe 2p, (b) Ni 2p, and (c) Mo 3d for  $\text{Mo}_2\text{C}/\text{FeNiMo}$  after OER stability test.

**Table S13.** Ratio of  $(\text{Ni}^0 + \text{Mo}^0 + \text{Mo}^{2+}) / (\text{Ni}^0 + \text{Ni}^{2+} + \text{Mo}^0 + \text{Mo}^{2+} + \text{Mo}^{4+} + \text{Mo}^{6+})$  for  $\text{Mo}_2\text{C}/\text{NiMo}$  before and after HER stability test.

|                                   | Ni      | Mo      |
|-----------------------------------|---------|---------|
| $\text{Mo}_2\text{C}/\text{NiMo}$ | A/B (%) | A/B (%) |
| before                            | 11.5    | 26.7    |
| after                             | 7.5     | 9.2     |

**Table S14.** Ratio of  $(\text{Fe}^0+\text{Ni}^0+\text{Mo}^0+\text{Mo}^{2+})/(\text{Fe}^0+\text{Fe}^{2+}+\text{Fe}^{3+}+\text{Ni}^0+\text{Ni}^{2+}+\text{Mo}^0+\text{Mo}^{2+}+\text{Mo}^{4+}+\text{Mo}^{6+})$  for  $\text{Mo}_2\text{C}/\text{FeNiMo}$  before and after OER stability test.

|                                     | Fe      | Ni      | Mo      |
|-------------------------------------|---------|---------|---------|
| $\text{Mo}_2\text{C}/\text{FeNiMo}$ | A/B (%) | A/B (%) | A/B (%) |
| before                              | 12.0    | 18.3    | 27.6    |
| after                               | 0.0     | 0.0     | 0.0     |

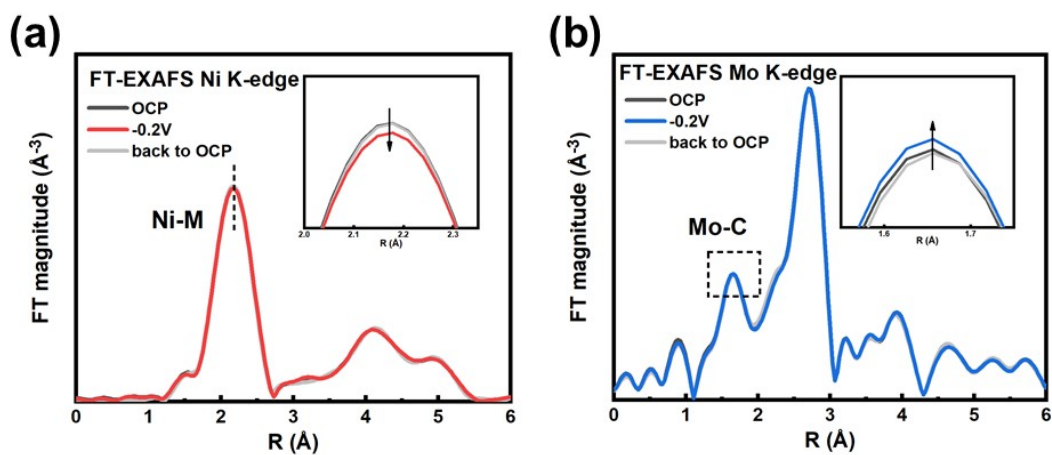

**Figure S8.** In-situ FT-EXAFS spectra of  $\text{Mo}_2\text{C}/\text{NiMo}$  under cathodic condition at (a) Ni K-edge and (b) Mo K-edge. Insets show corresponding locally enlarged overlaid curves.

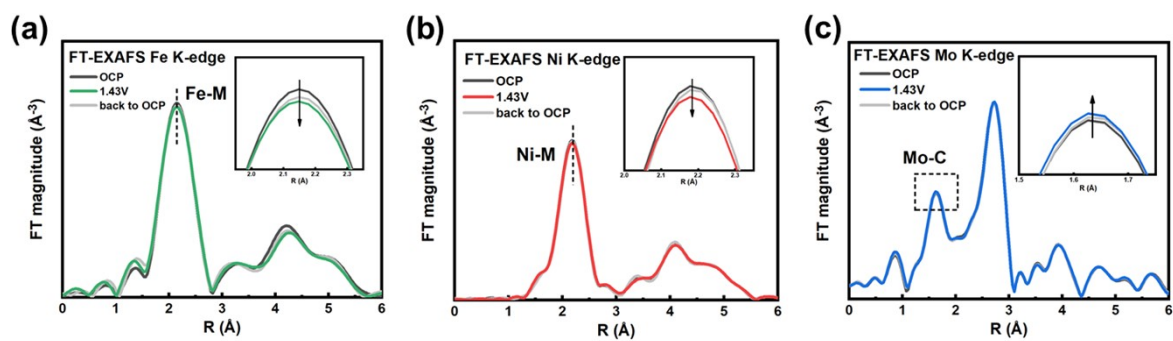

**Figure S9.** In-situ FT-EXAFS spectra of Mo<sub>2</sub>C/FeNiMo under anodic condition at (a) Fe K-edge, (b) Ni K-edge, and (c) Mo K-edge. Insets show corresponding locally enlarged overlaid curves.

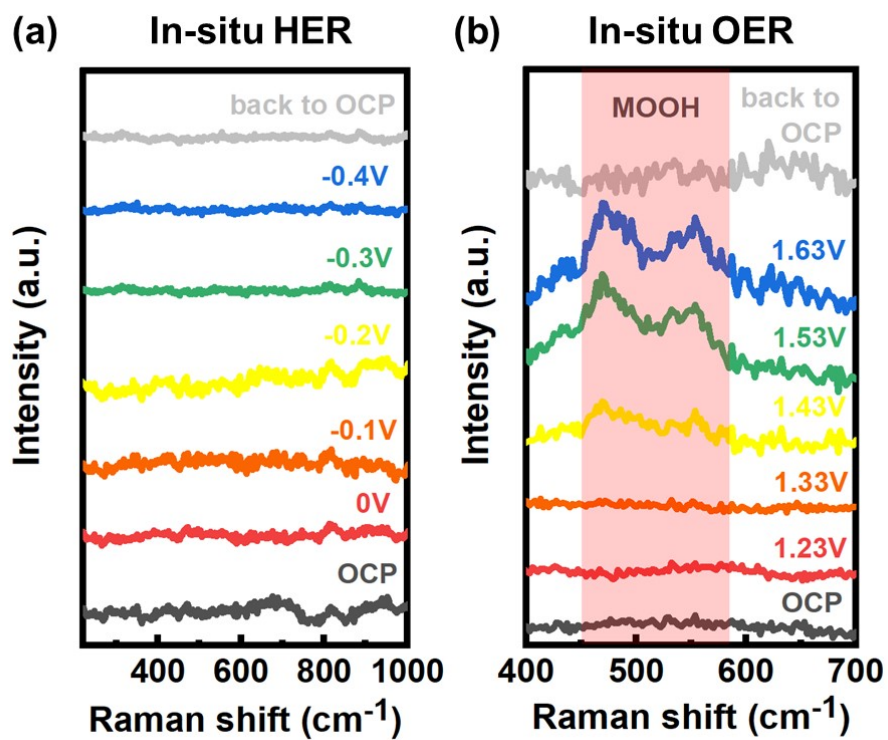

**Figure S10.** In-situ Raman spectra of (a) Mo<sub>2</sub>C/NiMo under HER conditions and (b) Mo<sub>2</sub>C/FeNiMo under OER conditions.

## References

- [S1] Dong YM, Wu AP, Yang GC, Wang JQ, Liu Y, Yan HJ, et al., Lower-Temperature Synthesis of Nitrogen-Rich Molybdenum Nitride/Nickel (Cobalt) Heterojunctional Assembly for the Effective Water Electrolysis, *Advanced Functional Materials*, 2025; 35: 2412979.
- [S2] Zhou T, Yu S, Tang YQ, Huang XT, Fu JJ, Shen PK, et al., Built-in electric field engineering of MoO<sub>2</sub>-Ni heterostructure by P<sub>3p</sub>-Mo<sub>4d</sub>-Tm<sub>4f</sub> orbitals hybridization for efficient industrial-level hydrogen production, *Chemical Engineering Journal*, 2025; 508: 160921 .
- [S3] Wen T, Zheng Y, Wang HT, Zou J, Constructing black phosphorus nanosheet/CoNiSe<sub>2</sub> nanoflower heterojunction with effective built-in electric field for robust H<sub>2</sub> evolution in anion exchange membrane water electrolyzer, *Applied Catalysis B-Environment and Energy*, 2025; 378: 125588.
- [S4] Chanda D, Kannan K, Gautam J, Meshesha MM, Jang SG, Dinh V, et al., Effect of the interfacial electronic coupling of nickel-iron sulfide nanosheets with layer Ti<sub>3</sub>C<sub>2</sub> MXenes as efficient bifunctional electrocatalysts for anion-exchange membrane water electrolysis, *Applied Catalysis B-Environment and Energy*, 2023; 321: 122039.
- [S5] Zhang F, Wang K, Zhang H, Yang SL, Xu M, He Y, et al., Dynamic Reconstruction of Ce-Doped Fe<sub>2</sub>P/NiCoP Hybrid for Ampere-Level Oxygen Evolution in Anion Exchange Membrane Water Electrolysis, *Advanced Functional Materials*, 2025; 35: 2500861.
- [S6] Chen YH, Yue KH, Zhao JW, Cai ZY, Wang XY, Yan Y, Effective modulating of the Mo dissolution and polymerization in Ni<sub>4</sub>Mo/NiMoO<sub>4</sub> heterostructure via metal-metal oxide-support interaction for boosting H<sub>2</sub> production, *Chemical Engineering Journal*, 2023; 466: 143097.
- [S7] Guo L, Liu XY, He ZX, Chen ZC, Zhang ZY, Pan L, et al., Self-Supported Bimetallic Phosphide Heterojunction-Integrated Electrode Promoting High-Performance Alkaline Anion-Exchange Membrane Water Electrolysis, *ACS Sustain Chem Eng*, 2022; 10: 9956-68.
- [S8] Kim NI, Lee J, Jin S, Jeong J, Myeong SW, Ha JS, et al., Collapsing the Bottleneck by Interfacial Effect of Ni/CeO for Long-Term Hydrogen Production using Waste Alkaline Water in Practical-Scale Anion Exchange Membrane Water Electrolyzer, *Adv Sci*, 2025; 12: e02484.
- [S9] Oh S, Roh H, Im H, Seo O, Takagi Y, Watanabe T, et al., Mn doped hierarchical water splitting electrocatalyst: Synthesis, surface analysis and application to AEMWE, *Chemical Engineering Journal*, 2024; 500: 157106.
